# Supplementary material for: DIFFUSE: predicting isoform functions from sequences and expression profiles via deep learning
Source: PubMed Central journal article supplement — Bioinformatics. 2019 Jul 5;35(14):i284–94. doi: 10.1093/bioinformatics/btz367 (PMC6612874; doi:10.1093/bioinformatics/btz367), 2019-07-05
Supplement: btz367_supplementary_data.pdf [file btz367_supplementary_data.pdf]

# DIFFUSE: Predicting isoform functions from sequences and expression via deep learning (Supplementary Materials)

Hao Chen<sup>1</sup>, Dipan Shaw<sup>1</sup>, Jianyang Zeng<sup>2</sup>, Dongbo Bu<sup>3,4</sup> and Tao Jiang<sup>1,5</sup>

<sup>1</sup>Department of Compute Science and Engineering, University of California, Riverside, CA 92521, USA

<sup>2</sup>Institute for Interdisciplinary Information Sciences, Tsinghua University, Beijing 100084, China

<sup>3</sup>Key Lab of Intelligent Information Process, Institute of Computing Technology, Chinese Academy of Sciences, Beijing 100190, China

<sup>4</sup>University of Chinese Academy of Sciences, Beijing 100049, China

<sup>5</sup>Bioinformatics Division, BNRIST/Department of Computer Science and Technology, Tsinghua University, Beijing 100084, China.

## 1 Supplementary figures

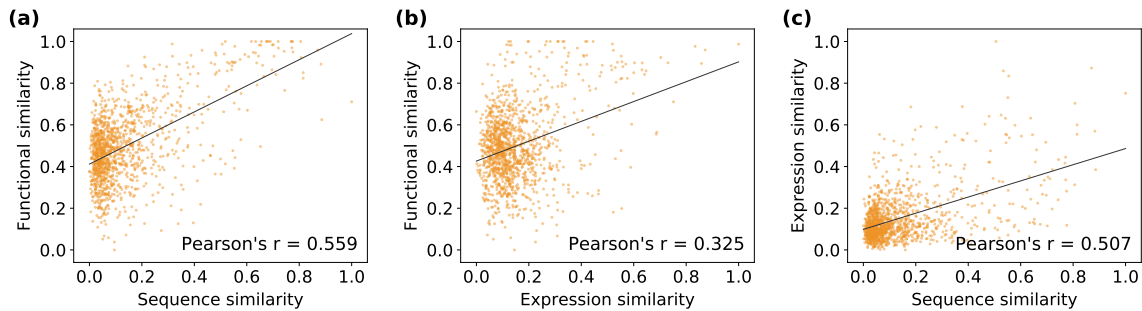

**Figure S1:** Correlations between functional similarity, sequence similarity and expression similarity at the gene level. The genes are grouped into 1254 clusters with sizes in the range of [10, 20] based on hierarchical clustering. The average pairwise functional similarity, sequence similarity and expression similarity are estimated for each cluster. The Pearson correlation coefficient (PCC) is used to measure the correlations.

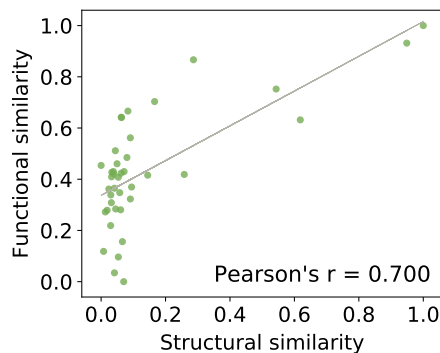

**Figure S2:** The correlation between functional similarity and structural similarity measured on 600 SIGs that are grouped into 40 clusters with sizes in the range of [10, 20]. The functional similarity is estimated based on the annotated functions of the SIGs. The result is consistent with the PCC value in Figure 7(a).

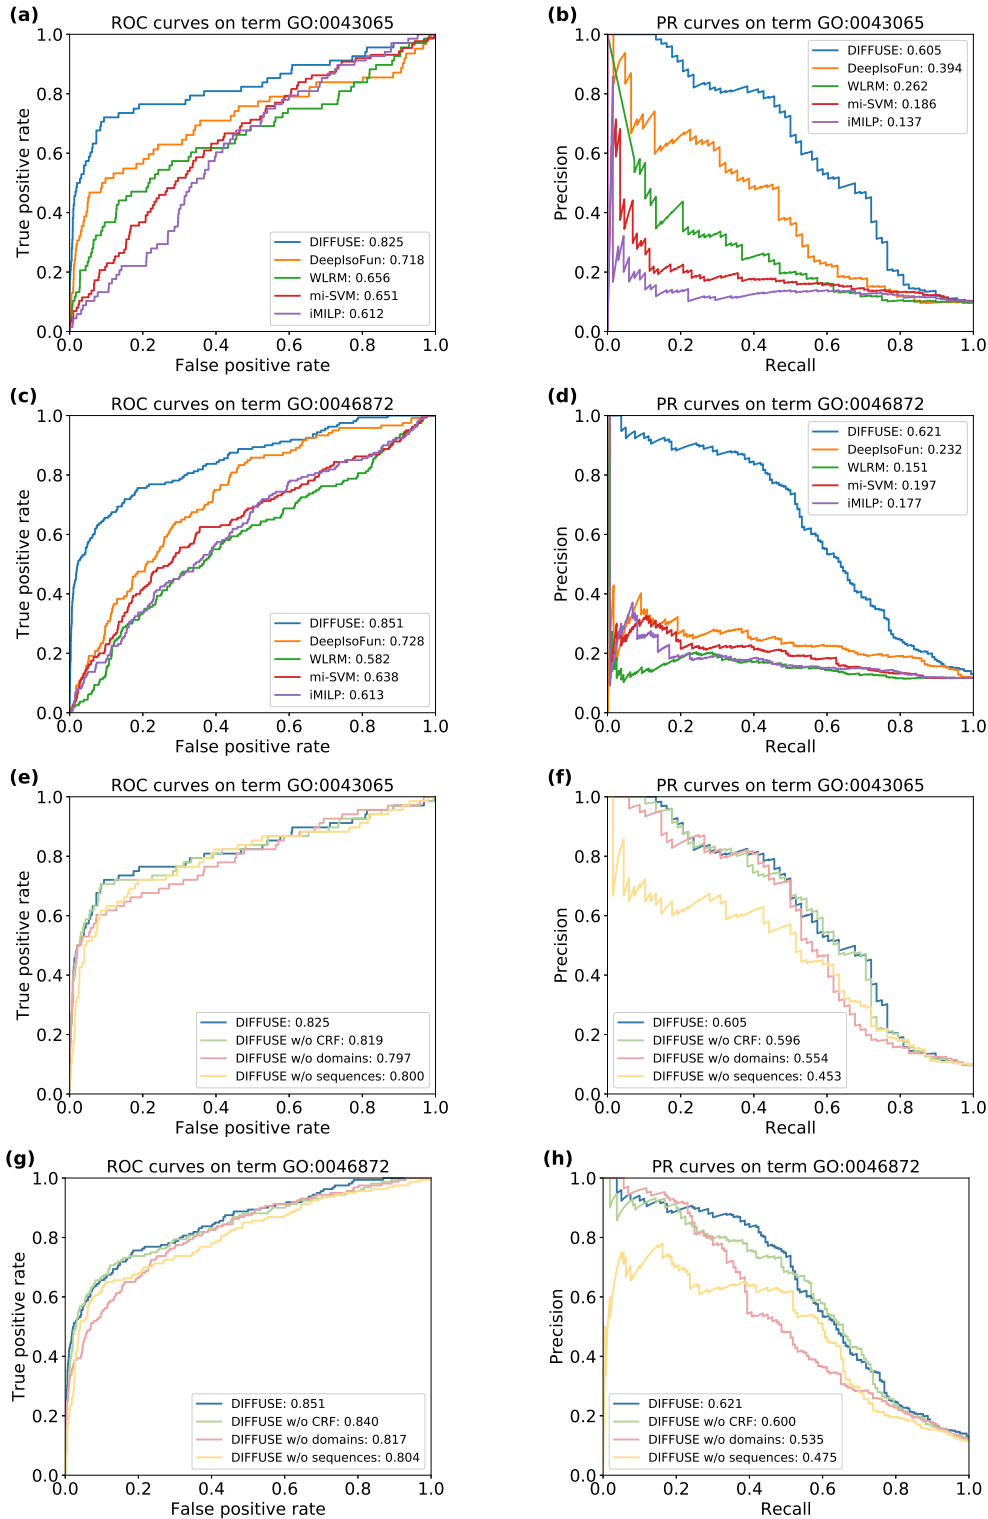

**Figure S3:** Example receiver operating characteristic (ROC) curves and precision-recall (PR) curves on terms GO:0043065 (positive regulation of apoptotic process) and GO:0046872 (metal ion binding). The term GO:0043065 has been studied extensively in the literature (Li et al., 2013; Shaw et al., 2018) and the term GO:0046872 is used to validate our prediction results in Table 2. The plots (a-d) illustrate the ROC and PR curves achieved by the methods compared in Table 1. The curves on both GO terms demonstrate that DIFFUSE performs better than the other methods across all thresholds on false positive rate or recall. The plots (e-h) illustrate the ROC and PR curves on the same GO terms achieved by the four variants of DIFFUSE discussed in section 3.1.3. The PR curves on both GO terms suggest that after removing sequence features from DIFFUSE, the model predicts more false positives with high scores, which may explain why the AUPRC of DIFFUSE drops so significantly without using sequences.

## 2 Supplementary tables

**Table S1:** Comparison of the performance of DIFFUSE in training and testing on all three datasets. The average performance gaps across the three datasets are 6.3% in terms of AUC and 8.3% in terms of AUPRC. These are well within acceptable ranges reported in the literature (Zhang et al., 2016; Keskar et al., 2016) and thus likely to indicate that our model was not grossly overtrained in the experiments.

|                         | Dataset#1 |       | Dataset#2 |       | Dataset#3 |       |
|-------------------------|-----------|-------|-----------|-------|-----------|-------|
|                         | AUC       | AUPRC | AUC       | AUPRC | AUC       | AUPRC |
| DIFFUSE <i>training</i> | 0.891     | 0.632 | 0.882     | 0.588 | 0.875     | 0.574 |
| DIFFUSE <i>test</i>     | 0.835     | 0.585 | 0.828     | 0.537 | 0.817     | 0.524 |

**Table S2:** Consistency between the presence or absence of sequence feature ‘Metal ion binding site’ and the function predictions concerning GO term GO:0046872 (metal ion binding). Note that a metal ion may have several binding sites. We treat the binding sites that correspond to the same metal ion as a group. Each isoform sequence may contain multiple metal ion binding site groups. If all metal ion binding site groups of an isoform have binding sites affected by alternative splicing, we treat the sequence feature ‘Metal ion binding site’ as absent in this isoform, noted by a cross. Otherwise, we treat it as present in this isoform, noted by a circle. Positive and negative predictions are represented by circles and crosses as well.

| Gene     | Isoform   | Sequence feature | Predictions |            |      |        |       |
|----------|-----------|------------------|-------------|------------|------|--------|-------|
|          |           |                  | DIFFUSE     | DeepIsoFun | WLRM | mi-SVM | iMILP |
| ACE      | P12821-1  | ○                | ○           | ○          | ○    | ○      | ○     |
|          | P12821-3  | ○                | ○           | ○          | ×    | ○      | ○     |
|          | P12821-4  | ○                | ○           | ○          | ○    | ○      | ○     |
| ACMSD    | Q8TDX5-1  | ○                | ○           | ○          | ○    | ○      | ○     |
|          | Q8TDX5-2  | ×                | ○           | ○          | ○    | ○      | ○     |
| ADAM33   | Q9BZ11-1  | ○                | ○           | ○          | ○    | ○      | ×     |
|          | Q9BZ11-2  | ○                | ○           | ○          | ○    | ○      | ○     |
| ADAMTS13 | Q76LX8-1  | ○                | ×           | ○          | ○    | ○      | ○     |
|          | Q76LX8-2  | ○                | ○           | ○          | ○    | ○      | ○     |
|          | Q76LX8-3  | ○                | ×           | ○          | ○    | ○      | ○     |
| ALKBH2   | Q6NS38-1  | ○                | ○           | ○          | ○    | ○      | ○     |
|          | Q6NS38-2  | ×                | ×           | ×          | ○    | ○      | ○     |
| ALKBH8   | Q96BT7-1  | ○                | ○           | ○          | ○    | ○      | ○     |
|          | Q96BT7-4  | ○                | ○           | ○          | ○    | ○      | ○     |
| ALOX15B  | O15296-1  | ○                | ○           | ○          | ×    | ×      | ×     |
|          | O15296-2  | ○                | ○           | ○          | ○    | ○      | ○     |
|          | O15296-4  | ○                | ○           | ○          | ○    | ○      | ○     |
| ALOX5    | P09917-1  | ○                | ○           | ○          | ×    | ○      | ×     |
|          | P09917-2  | ○                | ○           | ○          | ○    | ×      | ×     |
|          | P09917-3  | ○                | ○           | ○          | ○    | ○      | ○     |
| AOC3     | Q16853-1  | ○                | ○           | ○          | ○    | ○      | ○     |
|          | Q16853-2  | ×                | ×           | ○          | ○    | ○      | ○     |
|          | Q16853-3  | ○                | ×           | ○          | ○    | ×      | ○     |
| APOBEC3F | Q8IUX4-1  | ○                | ×           | ○          | ○    | ○      | ○     |
|          | Q8IUX4-3  | ×                | ○           | ○          | ○    | ○      | ○     |
| APOBEC3G | Q9HC16-1  | ○                | ○           | ○          | ○    | ○      | ○     |
| ARG1     | P05089-1  | ○                | ○           | ○          | ○    | ○      | ○     |
|          | P05089-2  | ○                | ○           | ○          | ○    | ○      | ○     |
| ARSA     | P15289-2  | ×                | ×           | ○          | ○    | ○      | ×     |
|          | Q12797-1  | ○                | ○           | ○          | ○    | ○      | ○     |
| ASPH     | Q12797-10 | ○                | ○           | ○          | ○    | ○      | ○     |
|          | Q12797-2  | ×                | ×           | ○          | ○    | ×      | ○     |
|          | Q12797-3  | ×                | ×           | ○          | ○    | ○      | ○     |
|          | Q12797-4  | ×                | ×           | ○          | ○    | ○      | ○     |
|          | Q12797-5  | ×                | ×           | ○          | ○    | ×      | ○     |
|          | Q12797-6  | ×                | ×           | ○          | ○    | ×      | ○     |
|          | Q12797-7  | ×                | ×           | ×          | ○    | ○      | ○     |
|          | Q12797-8  | ×                | ×           | ○          | ○    | ×      | ○     |
|          | Q12797-9  | ×                | ×           | ○          | ○    | ○      | ○     |
|          | ATP1A1    | P05023-1         | ○           | ○          | ○    | ○      | ○     |
| ATP7A    | P05023-3  | ○                | ○           | ○          | ○    | ○      | ○     |
|          | P05023-4  | ○                | ○           | ×          | ○    | ○      | ○     |
| ATP7B    | Q04656-1  | ○                | ○           | ○          | ○    | ○      | ○     |
|          | Q04656-5  | ○                | ○           | ○          | ○    | ○      | ○     |
| DIS3L2   | P35670-1  | ○                | ○           | ○          | ○    | ○      | ○     |
|          | P35670-3  | ○                | ○           | ○          | ○    | ○      | ○     |
| DPP3     | Q81YB7-1  | ○                | ○           | ×          | ○    | ○      | ○     |
|          | Q81YB7-3  | ○                | ×           | ○          | ○    | ○      | ○     |
|          | Q81YB7-4  | ×                | ×           | ×          | ○    | ○      | ○     |
| DPP3     | Q9NY33-1  | ○                | ○           | ○          | ○    | ×      | ○     |
|          | Q9NY33-4  | ○                | ○           | ○          | ○    | ○      | ○     |

|               |          |   |       |       |       |       |       |
|---------------|----------|---|-------|-------|-------|-------|-------|
| ENDOV         | Q8N8Q3-1 | ○ | ○     | ○     | ○     | ○     | ○     |
|               | Q8N8Q3-2 | ○ | ○     | ○     | ○     | ○     | ○     |
|               | Q8N8Q3-3 | ○ | ○     | ○     | ○     | ○     | ○     |
| ENOSF1        | Q7L5Y1-1 | ○ | ○     | ○     | ○     | ○     | ×     |
|               | Q7L5Y1-6 | ○ | ×     | ×     | ○     | ○     | ○     |
| EPHX2         | P34913-1 | ○ | ×     | ○     | ○     | ○     | ○     |
|               | P34913-2 | × | ×     | ○     | ×     | ○     | ○     |
|               | P34913-3 | × | ○     | ○     | ○     | ○     | ○     |
| ERAP2         | Q6P179-1 | ○ | ○     | ○     | ○     | ×     | ○     |
|               | Q6P179-3 | ○ | ○     | ○     | ○     | ○     | ○     |
|               | Q6P179-4 | × | ×     | ○     | ○     | ○     | ×     |
| FAN1          | Q9Y2M0-1 | ○ | ○     | ○     | ×     | ○     | ○     |
|               | Q9Y2M0-2 | × | ○     | ○     | ○     | ○     | ○     |
| GALNT2        | Q10471-1 | ○ | ○     | ○     | ×     | ○     | ○     |
| GALT          | P07902-1 | ○ | ○     | ×     | ×     | ○     | ○     |
|               | P07902-2 | ○ | ×     | ○     | ○     | ○     | ○     |
| GCH1          | P30793-1 | ○ | ○     | ○     | ×     | ×     | ○     |
|               | P30793-2 | × | ×     | ×     | ×     | ○     | ×     |
|               | P30793-4 | × | ×     | ○     | ○     | ○     | ○     |
| HEPH          | Q9BQS7-3 | ○ | ○     | ○     | ○     | ○     | ○     |
|               | Q9BQS7-4 | ○ | ○     | ○     | ○     | ×     | ○     |
| HMGCL         | P35914-1 | ○ | ○     | ○     | ×     | ×     | ○     |
|               | P35914-2 | ○ | ○     | ○     | ○     | ○     | ○     |
| HMGCLL1       | Q8TB92-1 | ○ | ○     | ○     | ○     | ○     | ○     |
|               | Q8TB92-2 | ○ | ○     | ○     | ○     | ○     | ×     |
|               | Q8TB92-5 | ○ | ○     | ○     | ○     | ○     | ○     |
| IDE           | P14735-1 | ○ | ○     | ×     | ○     | ○     | ○     |
|               | P14735-2 | × | ×     | ○     | ×     | ×     | ○     |
| IMPA1         | P29218-1 | ○ | ○     | ○     | ○     | ×     | ○     |
|               | P29218-2 | ○ | ○     | ○     | ○     | ○     | ○     |
|               | P29218-3 | ○ | ○     | ○     | ○     | ○     | ○     |
| LHPP          | Q9H008-1 | ○ | ○     | ○     | ○     | ○     | ○     |
|               | Q9H008-2 | × | ×     | ○     | ○     | ×     | ○     |
| MASP1         | P48740-1 | ○ | ○     | ○     | ○     | ○     | ○     |
|               | P48740-2 | ○ | ○     | ○     | ○     | ○     | ○     |
|               | P48740-3 | ○ | ○     | ○     | ○     | ×     | ○     |
| MPPE1         | Q53F39-1 | ○ | ○     | ○     | ○     | ○     | ○     |
|               | Q53F39-4 | ○ | ○     | ○     | ○     | ○     | ○     |
| NOS1          | P29475-1 | ○ | ○     | ○     | ○     | ○     | ○     |
|               | P29475-3 | ○ | ○     | ○     | ○     | ○     | ○     |
|               | P29475-5 | ○ | ○     | ○     | ○     | ○     | ○     |
| PGM1          | P36871-1 | ○ | ○     | ○     | ○     | ○     | ○     |
|               | P36871-2 | ○ | ○     | ○     | ○     | ○     | ○     |
|               | P36871-3 | × | ×     | ○     | ×     | ×     | ○     |
| PPM1M         | Q96MI6-4 | ○ | ○     | ×     | ○     | ×     | ○     |
| PPP3CA        | Q08209-1 | ○ | ○     | ○     | ○     | ○     | ×     |
|               | Q08209-2 | ○ | ○     | ○     | ×     | ○     | ○     |
|               | Q08209-3 | ○ | ○     | ○     | ○     | ○     | ○     |
| QPCTL         | Q9NXS2-1 | ○ | ○     | ○     | ○     | ○     | ○     |
|               | Q9NXS2-3 | × | ×     | ○     | ○     | ×     | ○     |
| RGN           | Q15493-1 | ○ | ○     | ○     | ○     | ○     | ○     |
|               | Q15493-2 | × | ×     | ○     | ○     | ○     | ○     |
| RPE           | Q96AT9-1 | ○ | ○     | ○     | ○     | ○     | ×     |
|               | Q96AT9-3 | × | ○     | ○     | ○     | ×     | ○     |
|               | Q96AT9-4 | × | ○     | ○     | ○     | ×     | ×     |
|               | Q96AT9-5 | × | ○     | ○     | ○     | ○     | ×     |
| SOD2          | P04179-1 | ○ | ○     | ○     | ×     | ×     | ○     |
|               | P04179-2 | × | ○     | ○     | ○     | ×     | ○     |
|               | P04179-3 | ○ | ○     | ○     | ○     | ○     | ○     |
|               | P04179-4 | ○ | ○     | ○     | ×     | ○     | ○     |
| SUV39H2       | Q9H511-1 | ○ | ○     | ○     | ○     | ○     | ○     |
|               | Q9H511-2 | ○ | ○     | ×     | ○     | ○     | ○     |
|               | Q9H511-3 | ○ | ×     | ○     | ○     | ○     | ○     |
| TET2          | Q6N021-1 | ○ | ○     | ×     | ×     | ○     | ○     |
|               | Q6N021-2 | × | ×     | ○     | ○     | ○     | ○     |
| THTPA         | Q9BU02-1 | ○ | ○     | ○     | ○     | ○     | ○     |
|               | Q9BU02-2 | × | ×     | ○     | ○     | ○     | ○     |
| USP16         | Q9Y5T5-1 | ○ | ○     | ×     | ○     | ○     | ○     |
|               | Q9Y5T5-2 | ○ | ○     | ○     | ○     | ○     | ○     |
| XPNPEP1       | Q9NQW7-1 | ○ | ○     | ○     | ○     | ○     | ○     |
|               | Q9NQW7-3 | ○ | ○     | ○     | ×     | ○     | ○     |
|               | Q9NQW7-4 | ○ | ○     | ○     | ○     | ○     | ○     |
| Jaccard index |          |   | 0.674 | 0.548 | 0.514 | 0.534 | 0.560 |

**Table S3:** Consistency between the presence or absence of sequence feature ‘ATP binding site’ and the function predictions concerning GO term GO:0005524 (ATP binding). Again, note that an ATP may have several binding sites. We treat the binding sites that correspond to the same ATP as a group. Each isoform sequence may contain multiple ATP binding site groups. If all ATP binding site groups of an isoform have binding sites affected by alternative splicing, we treat the sequence feature ‘ATP binding site’ as absent in this isoform. Otherwise, we treat it as present in this isoform.

| Gene          | Isoform   | Sequence feature | Predictions |            |       |        |       |
|---------------|-----------|------------------|-------------|------------|-------|--------|-------|
|               |           |                  | DIFFUSE     | DeepIsoFun | WLRM  | mi-SVM | iMILP |
| ACLY          | P53396-1  | ○                | ○           | ○          | ○     | ×      | ○     |
|               | P53396-2  | ○                | ×           | ○          | ○     | ×      | ○     |
| BRSK2         | Q81WQ3-1  | ○                | ○           | ○          | ○     | ○      | ○     |
|               | Q81WQ3-2  | ○                | ○           | ○          | ○     | ○      | ○     |
|               | Q81WQ3-3  | ○                | ○           | ○          | ○     | ○      | ○     |
|               | Q81WQ3-5  | ○                | ○           | ○          | ○     | ×      | ○     |
|               | Q81WQ3-6  | ×                | ○           | ○          | ○     | ×      | ○     |
|               | Q9UQ88-1  | ○                | ○           | ○          | ○     | ○      | ○     |
| CDK11A        | Q9UQ88-2  | ○                | ○           | ○          | ○     | ○      | ○     |
|               | Q9UQ88-4  | ○                | ○           | ×          | ○     | ○      | ○     |
|               | P14735-1  | ○                | ○           | ×          | ×     | ○      | ○     |
| IDE           | P14735-2  | ×                | ×           | ○          | ×     | ×      | ○     |
|               | O95835-1  | ○                | ○           | ○          | ○     | ○      | ○     |
| LATS1         | O95835-2  | ×                | ×           | ×          | ○     | ×      | ○     |
|               | Q9P0L2-1  | ○                | ○           | ○          | ×     | ○      | ○     |
| MARK1         | Q9P0L2-3  | ○                | ○           | ○          | ○     | ○      | ×     |
|               | P49914-1  | ○                | ○           | ○          | ○     | ×      | ○     |
| MTHFS         | P29728-1  | ○                | ○           | ○          | ○     | ○      | ○     |
| OAS2          | P29728-2  | ○                | ○           | ○          | ○     | ○      | ○     |
|               | P29728-3  | ×                | ×           | ×          | ○     | ×      | ○     |
|               | [Q01813-2 | ×                | ○           | ○          | ×     | ×      | ×     |
| PFKP          | Q01813-1  | ○                | ○           | ○          | ○     | ○      | ○     |
|               | Q9Y2K2-5  | ○                | ○           | ○          | ○     | ○      | ○     |
| SIK3          | Q9Y2K2-8  | ○                | ○           | ○          | ○     | ○      | ○     |
|               | Q9P289-1  | ○                | ○           | ○          | ○     | ○      | ○     |
| STK26         | Q9P289-2  | ×                | ×           | ○          | ○     | ○      | ○     |
|               | Q9P289-3  | ○                | ×           | ○          | ○     | ○      | ○     |
|               | Q7L7X3-1  | ○                | ×           | ○          | ○     | ○      | ○     |
| TAOK1         | Q7L7X3-3  | ○                | ○           | ○          | ×     | ×      | ×     |
|               | Q6SA08-1  | ○                | ○           | ○          | ○     | ○      | ○     |
| TSSK4         | Q6SA08-2  | ○                | ○           | ○          | ×     | ○      | ○     |
|               | Q6SA08-3  | ×                | ×           | ○          | ○     | ○      | ○     |
|               | Q8TAS1-1  | ○                | ○           | ○          | ○     | ○      | ○     |
| UHMK1         | Q8TAS1-2  | ○                | ○           | ○          | ○     | ×      | ○     |
|               | Q8TAS1-3  | ×                | ×           | ○          | ×     | ○      | ○     |
|               | Q9H4A3-1  | ○                | ○           | ×          | ○     | ○      | ×     |
| WNK1          | Q9H4A3-5  | ○                | ○           | ○          | ○     | ○      | ○     |
|               | Q9H4A3-6  | ○                | ○           | ○          | ○     | ○      | ○     |
|               | Q96J92-1  | ○                | ○           | ○          | ○     | ×      | ○     |
| Jaccard index |           |                  | 0.700       | 0.595      | 0.578 | 0.517  | 0.581 |

**Table S4:** Consistency between the presence or absence of sequence feature ‘Nuclear localization signal’ and the function predictions concerning GO term GO:0005634 (nucleus). Note that each isoform sequence may contain multiple nuclear localization signals. If all the nuclear localization signals of an isoform are affected by alternative splicing, we treat the sequence feature ‘Nuclear localization signal’ as absent in this isoform. Otherwise, we treat it as present in this isoform.

| Gene          | Isoform   | Sequence feature | Predictions |            |       |        |       |   |
|---------------|-----------|------------------|-------------|------------|-------|--------|-------|---|
|               |           |                  | DIFFUSE     | DeepIsoFun | WLRM  | mi-SVM | iMILP |   |
| ADK           | P55263-1  | ○                | ○           | ○          | ○     | ○      | ○     | × |
|               | P55263-2  | ×                | ○           | ×          | ○     | ○      | ○     | ○ |
|               | P55263-3  | ○                | ○           | ○          | ×     | ×      | ×     | × |
|               | P55263-4  | ×                | ×           | ○          | ×     | ×      | ×     | × |
| AIFM1         | O95831-1  | ○                | ○           | ○          | ○     | ○      | ○     | ○ |
|               | O95831-3  | ○                | ○           | ○          | ○     | ×      | ×     | × |
|               | O95831-4  | ×                | ×           | ×          | ○     | ×      | ×     | × |
| APTX          | Q7Z2E3-1  | ○                | ○           | ○          | ○     | ○      | ○     | ○ |
|               | Q7Z2E3-10 | ○                | ○           | ○          | ○     | ×      | ○     | ○ |
|               | Q7Z2E3-11 | ○                | ○           | ○          | ○     | ○      | ○     | ○ |
|               | Q7Z2E3-3  | ×                | ×           | ○          | ○     | ×      | ○     | ○ |
|               | Q7Z2E3-5  | ○                | ○           | ○          | ○     | ○      | ○     | ○ |
|               | Q7Z2E3-7  | ○                | ○           | ○          | ○     | ○      | ○     | ○ |
| DDX25         | Q9UHL0-1  | ○                | ○           | ○          | ○     | ○      | ○     | ○ |
|               | Q9UHL0-2  | ×                | ○           | ○          | ○     | ×      | ×     | × |
| DNMT1         | P26358-1  | ○                | ○           | ○          | ○     | ○      | ○     | ○ |
|               | P26358-2  | ○                | ○           | ○          | ○     | ○      | ○     | ○ |
| ERBB2         | P04626-1  | ○                | ○           | ○          | ×     | ×      | ○     | ○ |
|               | P04626-4  | ○                | ○           | ○          | ○     | ○      | ○     | ○ |
|               | P04626-5  | ○                | ○           | ○          | ○     | ○      | ○     | ○ |
| ERCC2         | P18074-1  | ○                | ○           | ×          | ○     | ○      | ○     | ○ |
|               | P18074-2  | ×                | ×           | ○          | ×     | ×      | ×     | × |
| HIPK2         | Q9H2X6-1  | ○                | ○           | ○          | ○     | ○      | ○     | ○ |
|               | Q9H2X6-3  | ○                | ○           | ×          | ○     | ○      | ○     | × |
| JMJD6         | Q6NYC1-1  | ○                | ○           | ○          | ○     | ○      | ○     | ○ |
|               | Q6NYC1-3  | ○                | ○           | ○          | ○     | ○      | ○     | ○ |
| MAPK7         | Q13164-1  | ○                | ○           | ○          | ○     | ○      | ○     | ○ |
|               | Q13164-2  | ○                | ×           | ○          | ○     | ○      | ○     | ○ |
| MDM2          | Q00987-11 | ○                | ○           | ○          | ○     | ○      | ○     | ○ |
|               | Q00987-5  | ×                | ○           | ○          | ×     | ○      | ○     | ○ |
| OGFOD1        | Q8N543-2  | ×                | ×           | ○          | ○     | ○      | ○     | × |
| PAPOLA        | P51003-1  | ○                | ○           | ○          | ○     | ○      | ○     | ○ |
|               | P51003-2  | ×                | ×           | ×          | ×     | ○      | ○     | × |
| PIAS1         | O75925-1  | ○                | ○           | ×          | ○     | ○      | ○     | ○ |
|               | O75925-2  | ○                | ○           | ○          | ○     | ○      | ○     | ○ |
| PIAS2         | O75928-1  | ○                | ○           | ○          | ○     | ○      | ○     | ○ |
|               | O75928-2  | ○                | ○           | ○          | ○     | ○      | ○     | ○ |
|               | O75928-3  | ×                | ×           | ○          | ○     | ○      | ○     | ○ |
| PIK3C2A       | O00443-1  | ○                | ○           | ○          | ○     | ○      | ○     | ○ |
| PPP1R8        | Q12972-1  | ○                | ○           | ○          | ○     | ○      | ○     | ○ |
|               | Q12972-2  | ○                | ○           | ○          | ×     | ○      | ○     | ○ |
|               | Q12972-3  | ×                | ×           | ○          | ×     | ×      | ○     | ○ |
| REV1          | Q9UBZ9-2  | ○                | ○           | ○          | ○     | ○      | ○     | × |
| RTEL1         | Q9NZ71-1  | ○                | ○           | ○          | ○     | ○      | ○     | ○ |
|               | Q9NZ71-6  | ○                | ○           | ○          | ×     | ○      | ○     | × |
|               | Q9NZ71-7  | ○                | ○           | ○          | ○     | ×      | ×     | ○ |
|               | Q9NZ71-9  | ×                | ○           | ○          | ×     | ×      | ×     | × |
| SPAST         | Q9UBP0-1  | ○                | ○           | ○          | ○     | ○      | ○     | × |
|               | Q9UBP0-2  | ○                | ○           | ○          | ○     | ○      | ○     | ○ |
| USP4          | Q13107-1  | ○                | ○           | ×          | ×     | ○      | ○     | ○ |
|               | Q13107-2  | ○                | ×           | ○          | ○     | ○      | ○     | ○ |
|               | Q13107-3  | ×                | ×           | ×          | ○     | ○      | ○     | ○ |
| WWOX          | Q9NZC7-1  | ○                | ×           | ○          | ○     | ○      | ○     | ○ |
|               | Q9NZC7-3  | ○                | ○           | ○          | ○     | ○      | ○     | × |
| Jaccard index |           |                  | 0.700       | 0.579      | 0.580 | 0.569  | 0.521 |   |

## References

- Keskar, N. S., Mudigere, D., Nocedal, J., et al. (2016). On large-batch training for deep learning: Generalization gap and sharp minima. *arXiv preprint arXiv:1609.04836*.
- Li, W., Kang, S., Liu, C.-C., et al. (2013). High-resolution functional annotation of human transcriptome: predicting isoform functions by a novel multiple instance-based label propagation method. *Nucleic acids research*, 42(6):e39–e39.
- Shaw, D., Chen, H., and Jiang, T. (2018). DeepIsoFun: a deep domain adaptation approach to predict isoform functions. *Bioinformatics*, page bty1017.
- Zhang, C., Bengio, S., Hardt, M., et al. (2016). Understanding deep learning requires rethinking generalization. *arXiv preprint arXiv:1611.03530*.
